# Supplementary material for: Grain Characteristics, Moisture, and Specific Peptides Produced by Ustilaginoidea virens Contribute to False Smut Disease in Rice (Oryza sativa L.)
Source: MDPI journal article supplement (doi:10.3390/biom13040669), 2023-04-12
Supplement: s1 [file s1]

## Supplementary Data

### Grain characteristics, moisture, and specific peptides produced by *Ustilaginoidea virens* contribute to false-smut disease in rice (*Oryza sativa* L.)

Robinson C. Jose<sup>1,2</sup>, Thangjam Kanchal<sup>2</sup>, Bengyella Louis<sup>3</sup>, Narayan C. Talukdar<sup>1,4</sup>, Devasish Chowdhury<sup>1\*</sup>

<sup>1</sup>Institute of Advanced Study in Science and Technology, Guwahati, 781035, Assam, India.

<sup>2</sup>Institute of Bioresources and Sustainable Development (IBSD), Takyelpat, Imphal – 795001, Manipur, India.

<sup>3</sup>Department of Plant Sciences, 19 Tyson Building, University Park, Pennsylvania State University, 16802, PA, USA

<sup>4</sup>Assam down town University Sankar Madhab Path, Gandhi Nagar, Panikahiti, Guwahati-781026, Assam, India

Correspondence email: [devasish@iasst.gov.in](mailto:devasish@iasst.gov.in), Devasish Chowdhury

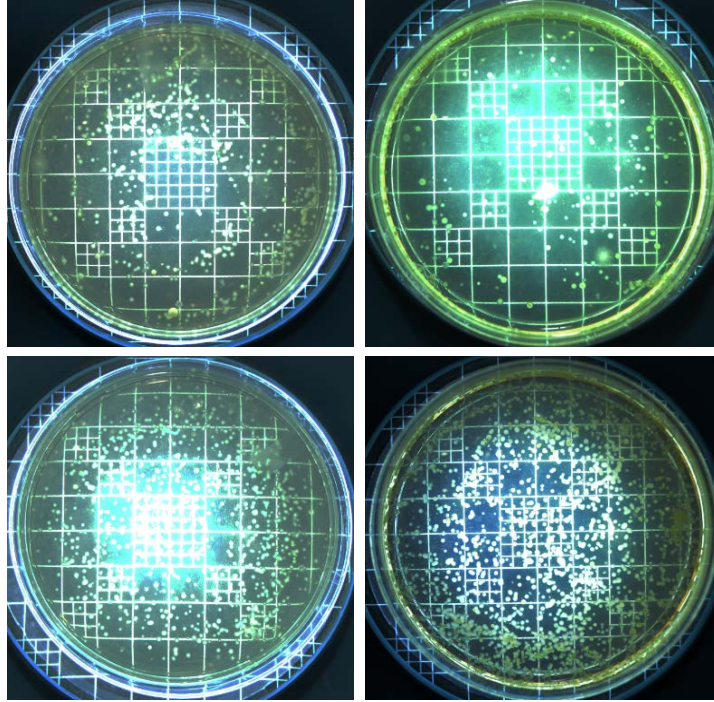

**Fig. S1.** Colony morphology of *U. virens* at 36 h post-germination at 25° C. The pathogen was isolated from rice smut balls and plated on PDA media containing the antibiotics chloramphenicol (25 mg L<sup>-1</sup>).

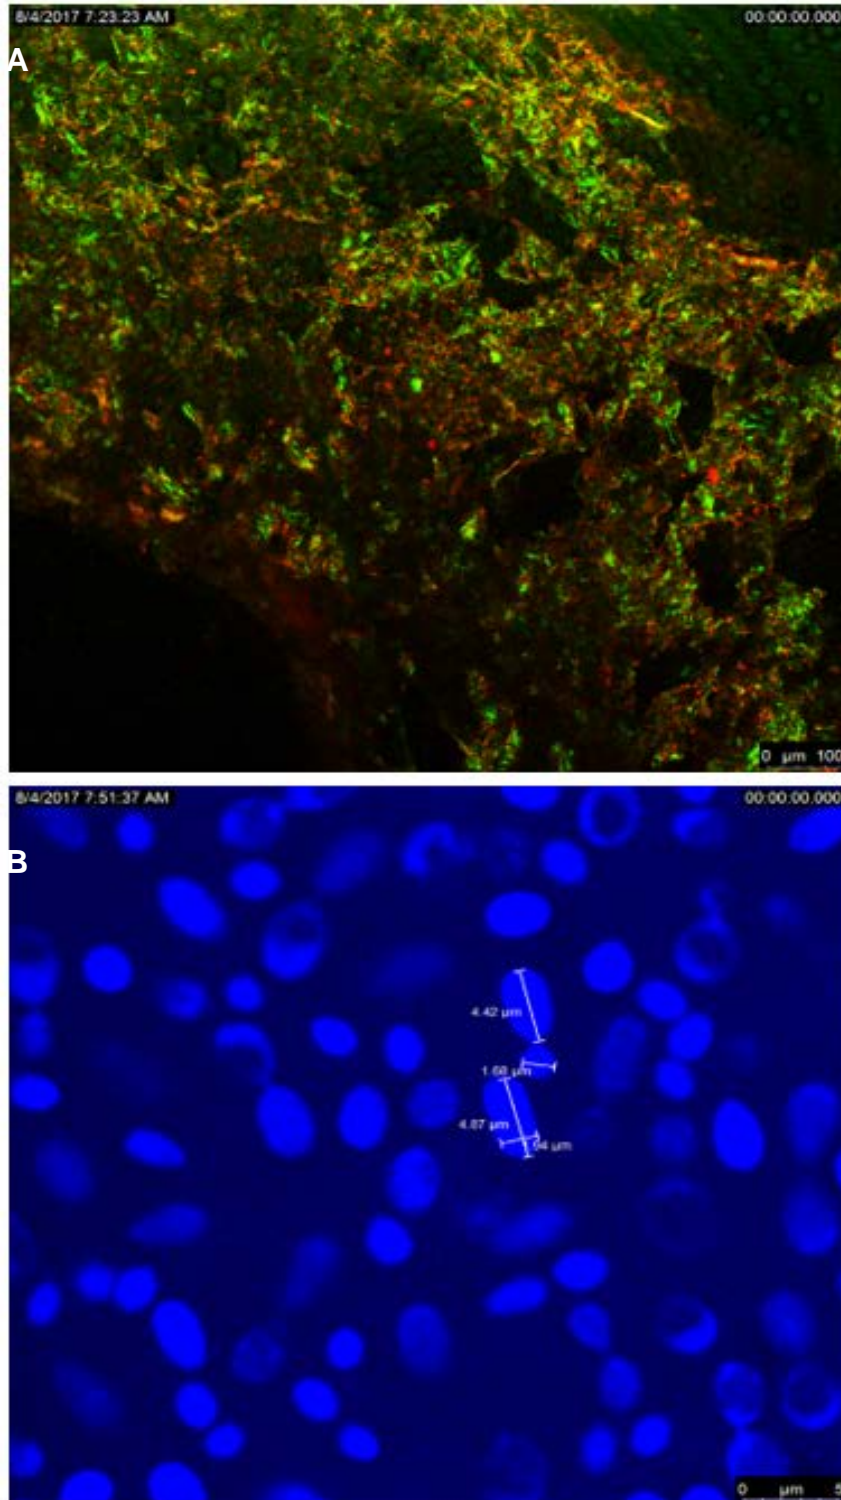

**Fig. S2.** Confocal microscopical view of *U. virens* interaction with the host using WGA and PI fluorescent stains (A) and the chlamydospores on germination to form ascospores and secondary conidial cells (B). bar; A = 100 μm, B = 5 μm.



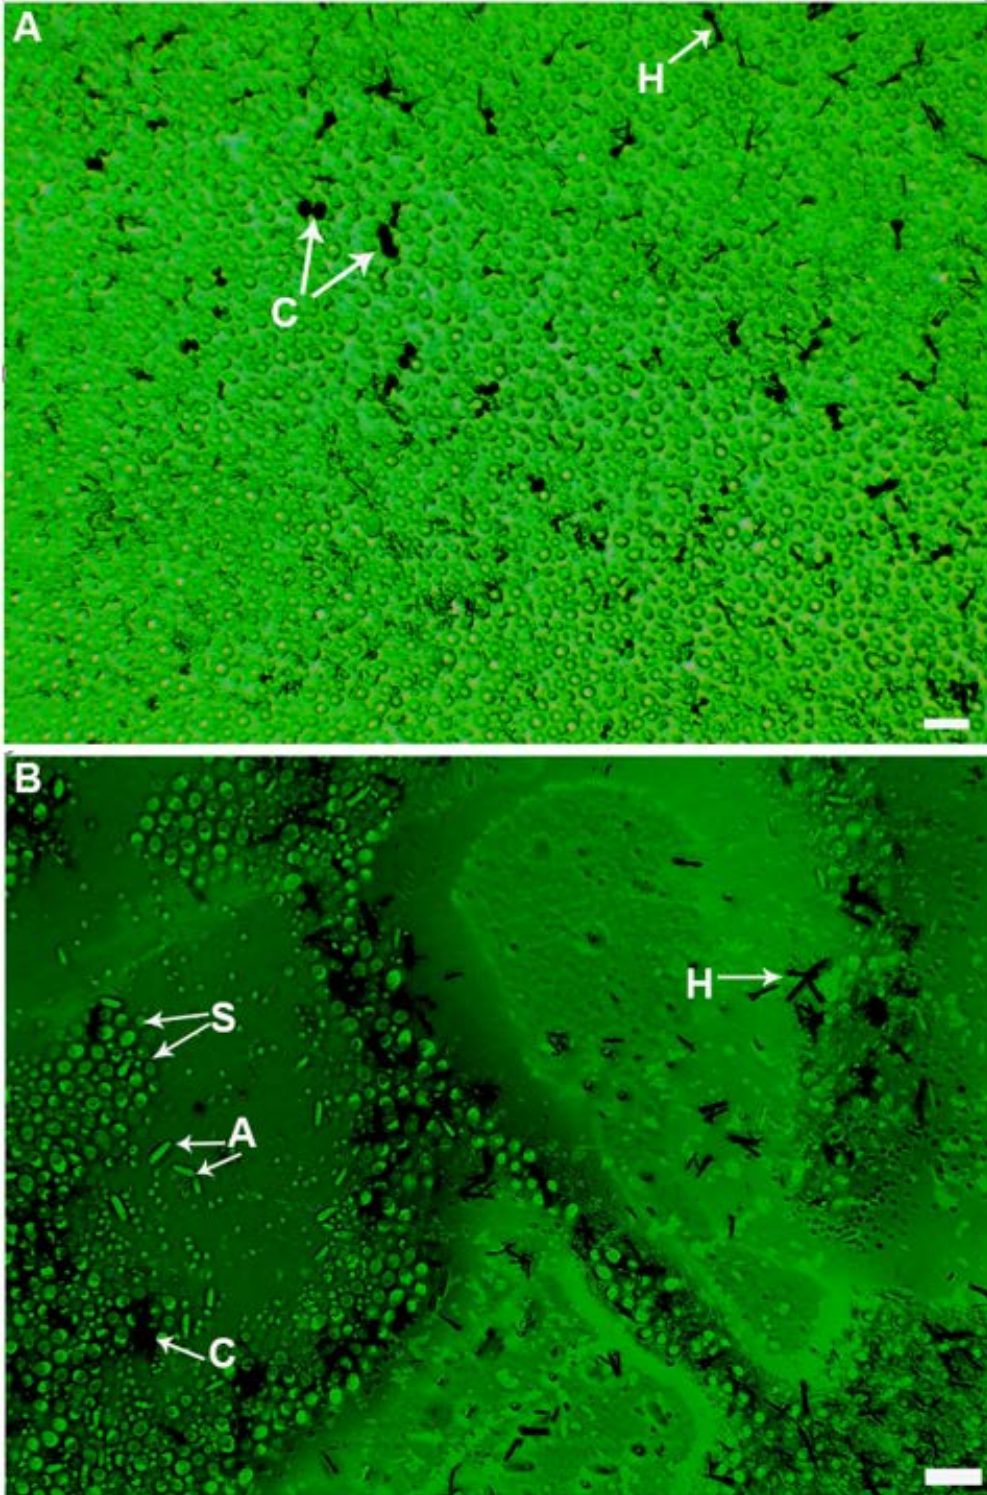

**Fig. S3.** Light microscopic view of *U. virens* chlamydospores (C) on germination to form Hyphae (H) ascospores (A) and secondary conidial cells (S) cells. bar; = 20  $\mu$ m.

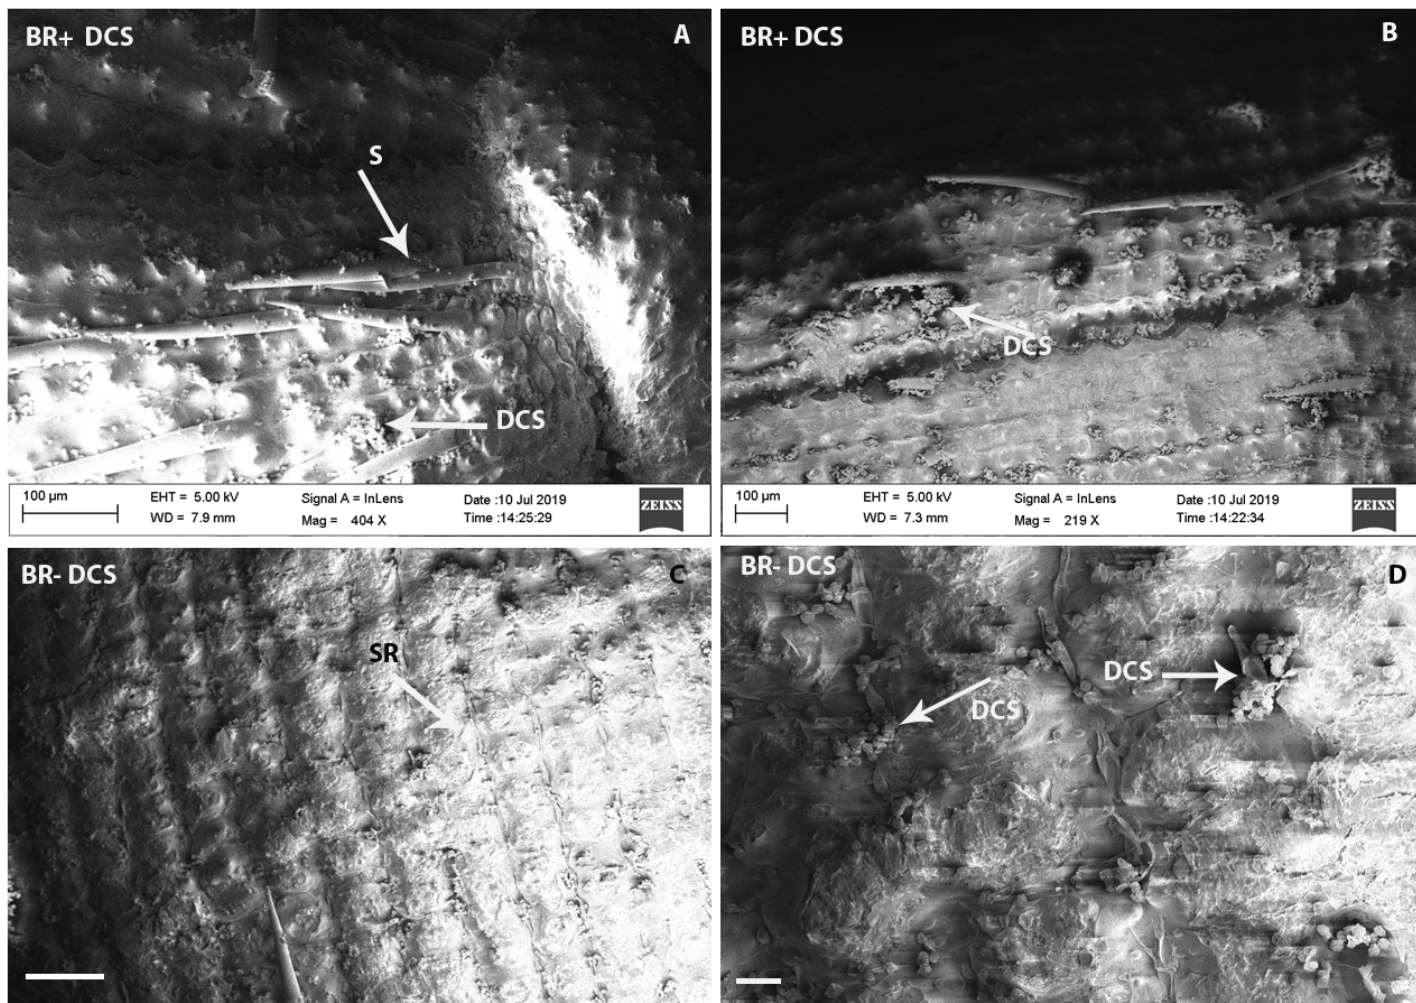

34 **Fig. S4** SEM micrographs depicting the surface of rice grains scrapped with a surgical blade to reveal the  
 35 interactions with dry chlamydospores (DCS/ C). Resistant Black rice is BR+ with spikes (S), and resistant  
 36 Black rice BR- without spikes. The scale bar for **A-C** = 100 μm and **D** = 20 μm.

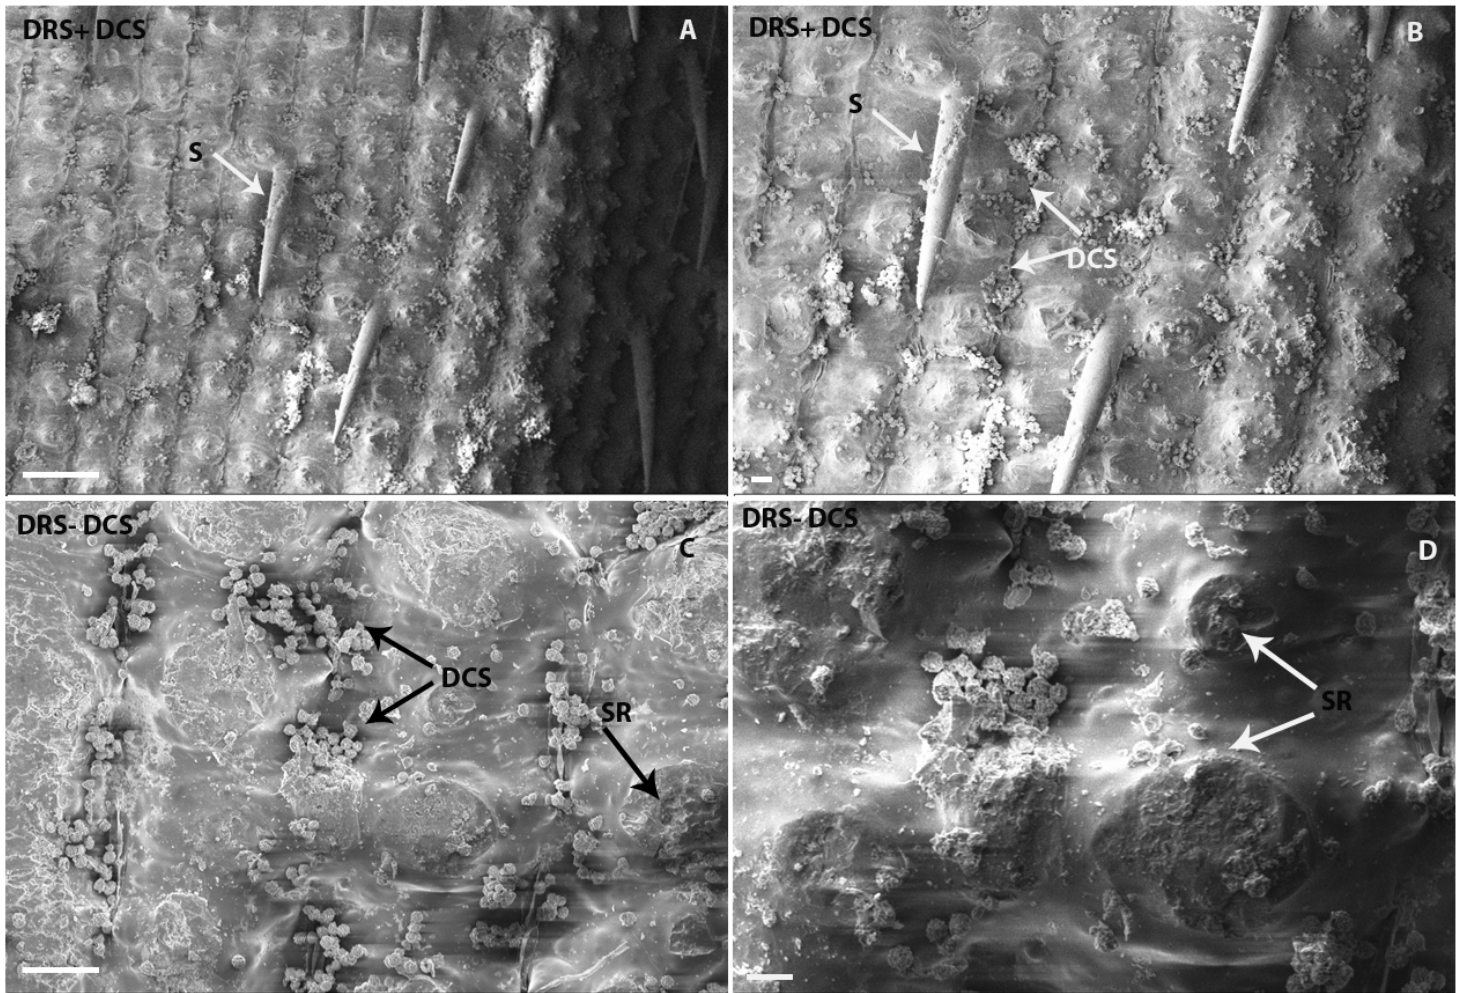

**Fig. S5.** SEM micrographs for susceptible rice grain variety Dharam. (A-B) Spikes present. (C-D) Spikes removed (SR), revealing the binding of dry chlamudospores of *U. virens* (DCS). The scale bar for A = 100  $\mu$ m, B = 20  $\mu$ m, C = 30  $\mu$ m, and D = 10  $\mu$ m.



51  
52  
53

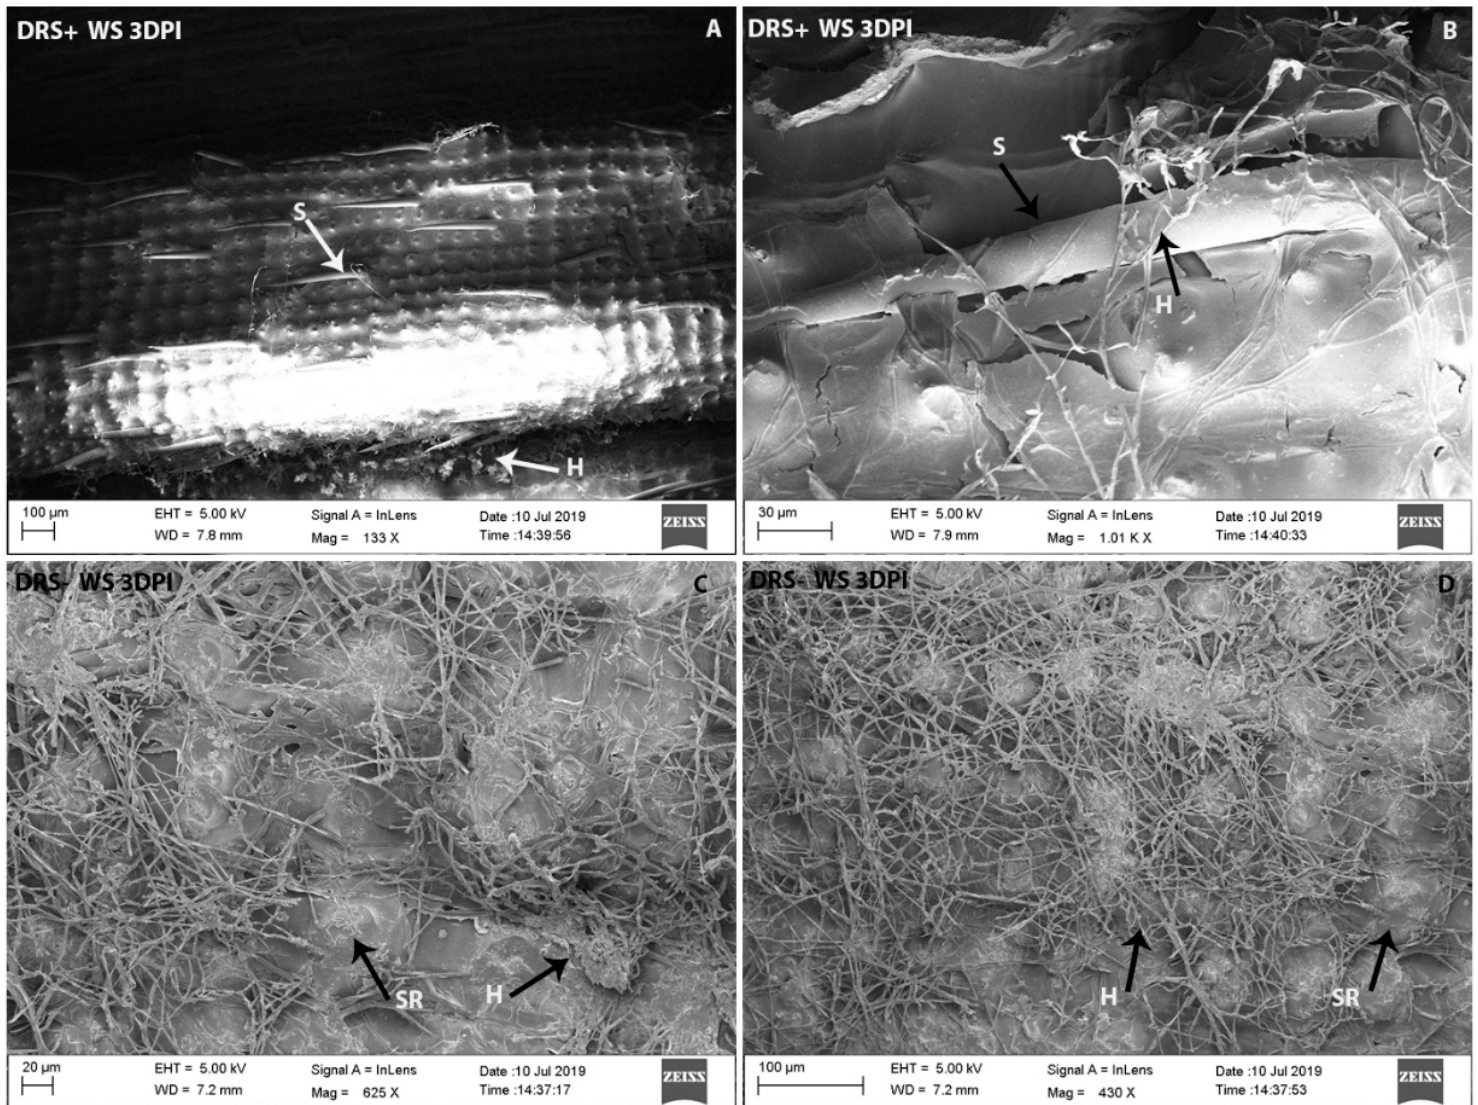

55 **Fig. S6.** SEM micrographs for susceptible rice grain variety Dharam (DRS). (A-B) Spikes present. (C-D)  
56 Spikes removed (SR), revealing the interaction with *U. virens* (DCS) 3 days post-inoculation. The scale bar  
57 for A = 100 µm, B = 20 µm, C = 30 µm, and D = 10 µm.

58  
59  
60  
61  
62

63  
64  
65  
66  
67

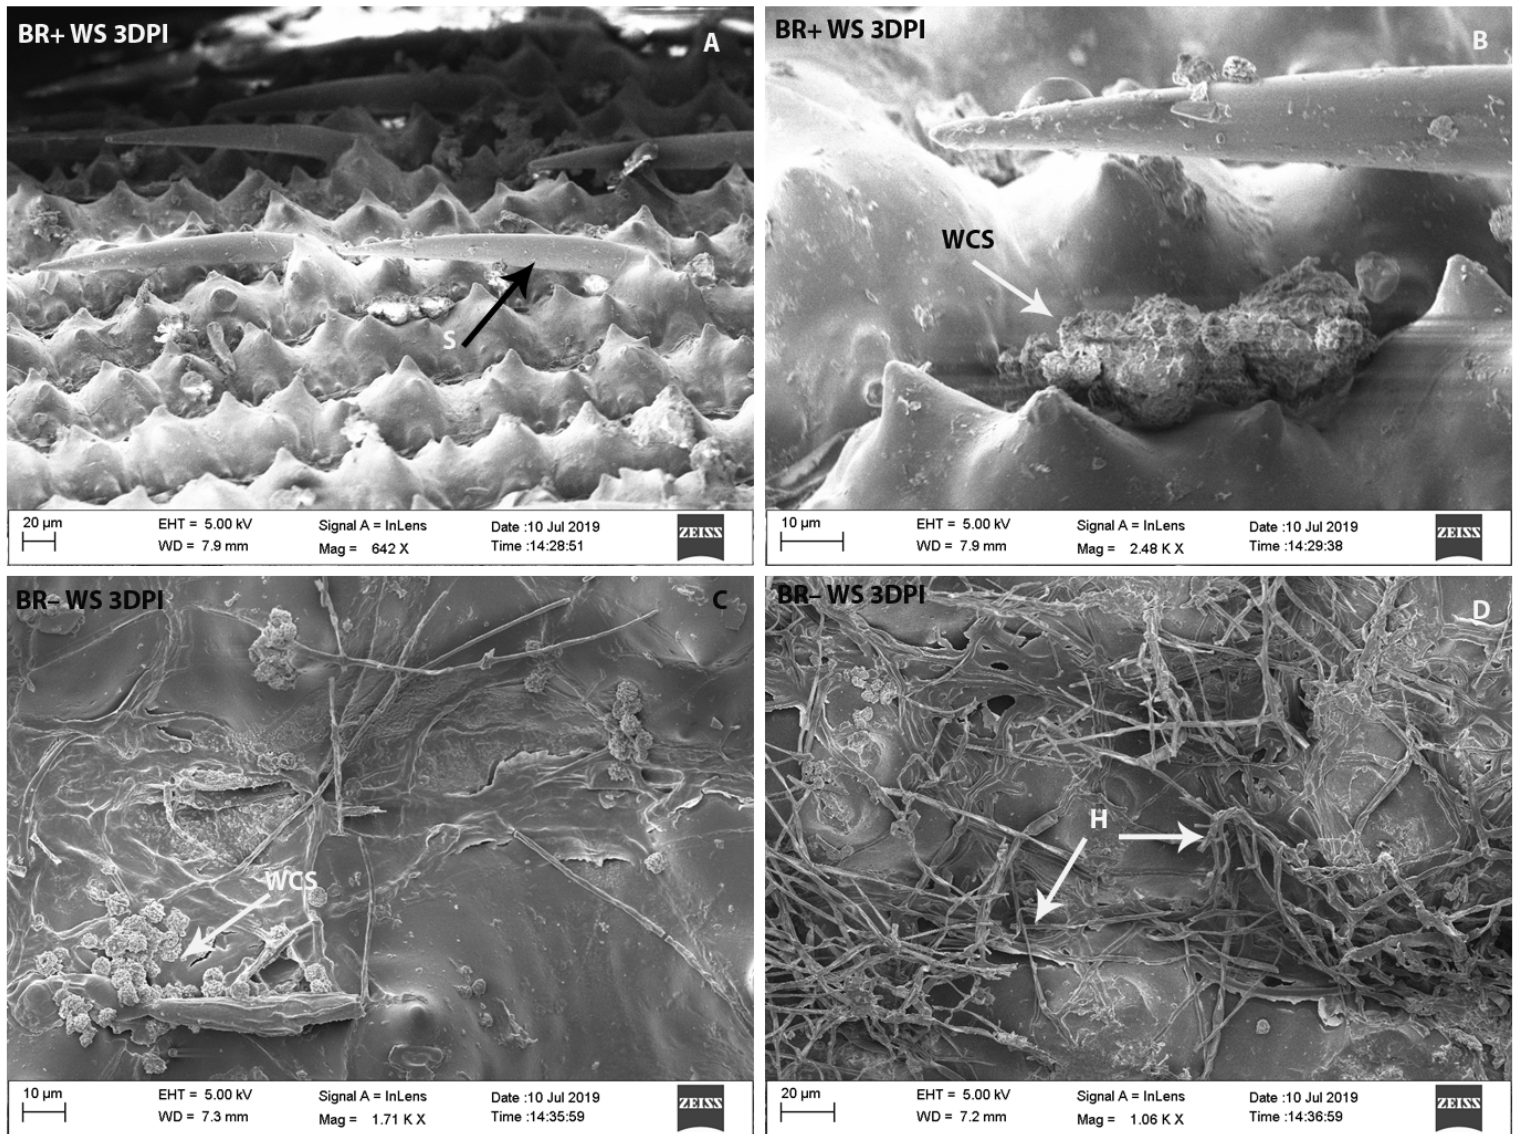

69 **Fig. S7.** SEM micrographs for resistant Black rice (BR+). (A-B) Spikes present. (C-D) Spikes removed  
70 (SR), revealing the interaction with chlamydospores (DCS) under wet conditions three days post-  
71 inoculation. The scale bar for A = 20 µm, B = 10 µm, C = 10 µm, and D = 20 µm. H is Hyphae.

72



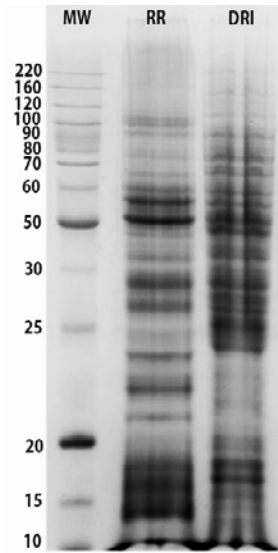

**Fig. S8.** SDS PAGE protein profile for uninfected Ranjit rice grains (RR) and infected Dharam rice (DRI) and the gel is calibrated with a molecular weight marker (MW).

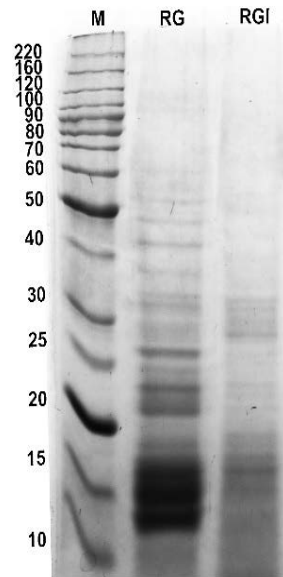

**Fig. S9.** SDS PAGE protein profile. Uninfected Thangjim (RG) rice grains and infected Thangjim (RGI) rice grains. The gel is calibrated with a molecular weight marker (MW).

**Table S1.** The frequency of the long spikes (LS) and small spikes (SS) on different grain varieties and the length and breadth in the center of the LS.

| Grain Variety | LS per 200 $\mu\text{m}^2$ | SS per 200 $\mu\text{m}^2$ | Length of LS in $\mu\text{m}$ | Diameter of LS in $\mu\text{m}$ |
|---------------|----------------------------|----------------------------|-------------------------------|---------------------------------|
| BR            | $3 \pm 1.41$               | $19.2 \pm 1.78$            | $330.76 \pm 1.24$             | $23.62 \pm 0.41$                |
| DS            | $1.6 \pm 0.54$             | $9 \pm 0$                  | $278.36 \pm 0.86$             | $26.64 \pm 0.19$                |
| RR            | $1.8 \pm 1.30$             | $10.8 \pm 7.52$            | $230.62 \pm 1.14$             | $24.49 \pm 0.24$                |
| TS            | $1.2 \pm 0.44$             | $11.8 \pm 3.03$            | $253.66 \pm 0.77$             | $25.49 \pm 0.43$                |

Note: LS is long spikes, SS is short spikes, BR (Black rice), DS (Dharam rice), RR (Ranjit rice), and TS (Thangjing) are various rice varieties.

**Table S2.** Elemental analysis for rice varieties, quantification for short spikes (SS) and long spikes (LS).

| Elements | Black rice   |              | Ranjit Rice  |              | Non-infected Dharam rice |              | Non-infected Thangjim rice |              |
|----------|--------------|--------------|--------------|--------------|--------------------------|--------------|----------------------------|--------------|
|          | SS           | LS           | SS           | LS           | SS                       | LS           | SS                         | LS           |
| C %      | 17.2 ± 0.1   | 28.33 ± 0.11 | 13.59 ± 0.31 | 50.33 ± 0.15 | 30.39 ± 0.32             | 25.52 ± 0.25 | 25.89 ± 0.06               | 36.56 ± 0.25 |
| O %      | 53.28 ± 0.20 | 48.33 ± 0.32 | 59.49 ± 0.34 | 21.72 ± 0.43 | 47.77 ± 0.27             | 43.73 ± 0.25 | 53.55 ± 0.01               | 55.81 ± 0.22 |
| Si %     | 29.31 ± 0.17 | 23.39 ± 0.22 | 25.77 ± 0.12 | 27.83 ± 0.16 | 21.52 ± 0.41             | 30.55 ± 0.14 | 20.20 ± 0.16               | 7.77 ± 0.15  |

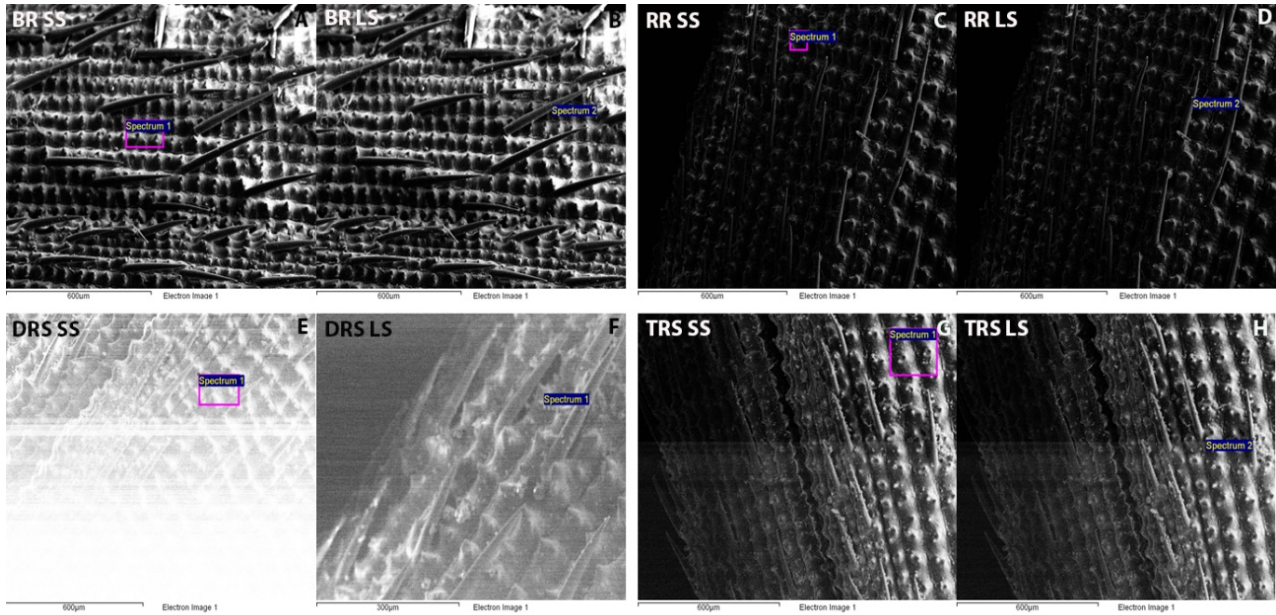

**Table S3.** The infection rate of two susceptible rice varieties, Dharam (DR) and Thangjim (TS) from Imphal State Manipur, India: Rice varieties such as Black rice (BR) and Ranjit Rice (RR) were resistant and did not have visible infected grains on the panicle.

| Rice Variety | Grains in 1 <sup>st</sup> Sampling | Grains in 2 <sup>nd</sup> Sampling | Grains in 3 <sup>rd</sup> Sampling | Infected grains | % Infection of all samplings |
|--------------|------------------------------------|------------------------------------|------------------------------------|-----------------|------------------------------|
| DR           | 201 ± 7.87                         | 206.6 ± 9.78                       | 209 ± 6.40                         | 58.4 ± 116.61   | 9.66 ± 19.35                 |
| TS           | 139.6 ± 6.69                       | 151.8 ± 19.13                      | 152.2 ± 31.30                      | 9.4 ± 3.50      | 2.14 ± 0.84                  |
| BR           | 265.6 ± 29.50                      | 238 ± 21.67                        | 236.4 ± 30.24                      | 0               | 0                            |
| RR           | 204.8 ± 11.18                      | 205.6 ± 19.66                      | 210 ± 9.38                         | 0               | 0                            |

132

133 **Table S4.** Details of proteins detected by LC-MS/ MS from resistant and susceptible rice varieties and also from *U. virens* during false-smut formation.

| <b>BAND 1</b> |             |           |            |             |             |              |              |                                                                                               |
|---------------|-------------|-----------|------------|-------------|-------------|--------------|--------------|-----------------------------------------------------------------------------------------------|
| <b>Score</b>  | <b>Mass</b> | <b>SC</b> | <b>NOS</b> | <b>NOSS</b> | <b>NOUS</b> | <b>NOSUS</b> | <b>emPAI</b> | <b>Description</b>                                                                            |
| 515           | 11362       | 0.5       | 4          | 4           | 4           | 4            | 4.1          | Uncharacterized protein OS= <i>Oryza sativa</i> subsp. indica OX=39946 GN=OsI_27503 PE=4 SV=1 |
| 464           | 11767       | 0.56      | 4          | 4           | 4           | 4            | 3.8          | OSIGBa0101P20.7 protein OS= <i>Oryza sativa</i> OX=4530 GN=OSIGBa0101P20.7 PE=4 SV=1          |
| 306           | 16859       | 0.38      | 3          | 3           | 3           | 3            | 1.28         | Prolamin PPROL 14E OS= <i>Oryza sativa</i> subsp. indica OX=39946 PE=3 SV=1                   |
| 257           | 10190       | 0.45      | 4          | 4           | 4           | 4            | 5.06         | Uncharacterized protein OS= <i>Oryza sativa</i> subsp. indica OX=39946 GN=OsI_19553 PE=4 SV=1 |
| 191           | 24057       | 0.32      | 6          | 6           | 6           | 6            | 2.2          | 1-Cys peroxiredoxin A OS= <i>Oryza sativa</i> subsp. indica OX=39946 GN=OsI_27030 PE=2 SV=1   |
| <b>BAND 2</b> |             |           |            |             |             |              |              |                                                                                               |
| <b>Score</b>  | <b>Mass</b> | <b>SC</b> | <b>NOS</b> | <b>NOSS</b> | <b>NOUS</b> | <b>NOSUS</b> | <b>emPAI</b> | <b>Description</b>                                                                            |
| 76            | 23716       | 0.1       | 2          | 2           | 2           | 2            | 0.48         | Uncharacterized protein OS= <i>Oryza sativa</i> subsp. indica OX=39946 GN=OsI_26825 PE=4 SV=1 |
| 67            | 24228       | 0.05      | 1          | 1           | 1           | 1            | 0.21         | 1-Cys peroxiredoxin A OS= <i>Oryza sativa</i> subsp. indica OX=39946 GN=OsI_27030 PE=2 SV=1   |
| 63            | 17838       | 0.16      | 2          | 2           | 2           | 2            | 0.68         | Allergen RA5B OS= <i>Oryza sativa</i> subsp. japonica OX=39947 GN=Os07g0215500 PE=2 SV=1      |



|               |             |           |            |             |             |              |              |                                                                                                                  |
|---------------|-------------|-----------|------------|-------------|-------------|--------------|--------------|------------------------------------------------------------------------------------------------------------------|
| 60            | 15190       | 0.07      | 1          | 1           | 1           | 1            | 0.36         | Oleosin OS= <i>Oryza sativa</i> OX=4530 GN=OSIGBa0101C23.13 PE=3 SV=1                                            |
| 55            | 10190       | 0.13      | 1          | 1           | 1           | 1            | 0.57         | Uncharacterized protein OS= <i>Oryza sativa</i> subsp. indica OX=39946<br>GN=OsI_19553 PE=4 SV=1                 |
| 54            | 16835       | 0.06      | 1          | 1           | 1           | 1            | 0.32         | Nucleoside diphosphate kinase 1 OS= <i>Oryza sativa</i> subsp. indica OX=39946<br>GN=NDKR PE=1 SV=1              |
| 53            | 17542       | 0.1       | 1          | 1           | 1           | 1            | 0.3          | Uncharacterized protein OS= <i>Oryza sativa</i> subsp. indica OX=39946<br>GN=OsI_25372 PE=4 SV=1                 |
| 51            | 17829       | 0.06      | 1          | 1           | 1           | 1            | 0.3          | Uncharacterized protein OS= <i>Oryza sativa</i> subsp. indica OX=39946<br>GN=OsI_25366 PE=4 SV=1                 |
| 48            | 19471       | 0.05      | 1          | 1           | 1           | 1            | 0.27         | Uncharacterized protein OS= <i>Oryza sativa</i> subsp. indica OX=39946<br>GN=OsI_28556 PE=4 SV=1                 |
| 48            | 16496       | 0.05      | 1          | 1           | 1           | 1            | 0.32         | Limit dextrinase inhibitor OS= <i>Oryza sativa</i> subsp. indica OX=39946<br>GN=OsI_25389 PE=4 SV=1              |
| 41            | 16458       | 0.06      | 1          | 1           | 1           | 1            | 0.33         | Uncharacterized protein OS= <i>Oryza sativa</i> subsp. indica OX=39946<br>GN=OsI_36717 PE=4 SV=1                 |
| 41            | 21497       | 0.04      | 1          | 1           | 1           | 1            | 0.24         | Uncharacterized protein OS= <i>Oryza sativa</i> subsp. indica OX=39946<br>GN=OsI_20488 PE=4 SV=1                 |
| 38            | 29253       | 0.04      | 1          | 1           | 1           | 1            | 0.17         | Bowman-Birk type bran trypsin inhibitor OS= <i>Oryza sativa</i> subsp. japonica<br>OX=39947 GN=RBBI3.3 PE=1 SV=2 |
| <b>BAND 3</b> |             |           |            |             |             |              |              |                                                                                                                  |
| <b>Score</b>  | <b>Mass</b> | <b>SC</b> | <b>NOS</b> | <b>NOSS</b> | <b>NOUS</b> | <b>NOSUS</b> | <b>emPAI</b> | <b>Description</b>                                                                                               |

| 448           | 17211 | 0.33 | 5   | 5    | 5    | 5     | 2.86  | Oleosin 18 kDa OS= <i>Oryza sativa</i> subsp. indica OX=39946 GN=OLE18 PE=3 SV=1                          |
|---------------|-------|------|-----|------|------|-------|-------|-----------------------------------------------------------------------------------------------------------|
| 200           | 18067 | 0.22 | 3   | 3    | 3    | 3     | 1.16  | Os03g0854400 protein OS= <i>Oryza sativa</i> subsp. japonica OX=39947 GN=Os03g0854400 PE=4 SV=1           |
| 180           | 18682 | 0.28 | 3   | 3    | 1    | 1     | 1.11  | Cold shock domain protein 2 OS= <i>Oryza sativa</i> subsp. japonica OX=39947 GN=P0582D05.112 PE=2 SV=1    |
| 188           | 16264 | 0.26 | 3   | 3    | 3    | 3     | 1.35  | Peptidylprolyl isomerase OS= <i>Oryza sativa</i> subsp. indica OX=39946 GN=OsI_31925 PE=4 SV=1            |
| 176           | 16769 | 0.47 | 6   | 6    | 6    | 6     | 4.28  | Nucleoside diphosphate kinase OS= <i>Oryza sativa</i> subsp. indica OX=39946 GN=OsI_34670 PE=2 SV=1       |
| <b>BAND 4</b> |       |      |     |      |      |       |       |                                                                                                           |
| Score         | Mass  | SC   | NOS | NOSS | NOUS | NOSUS | emPAI | Description                                                                                               |
| 1330          | 15242 | 0.4  | 3   | 3    | 2    | 2     | 1.5   | Superoxide dismutase [Cu-Zn] 1 OS= <i>Oryza sativa</i> subsp. japonica OX=39947 GN=SODCC1 PE=1 SV=1       |
| 918           | 15071 | 0.4  | 3   | 3    | 2    | 2     | 1.51  | Superoxide dismutase [Cu-Zn] 2 OS= <i>Oryza sativa</i> subsp. japonica OX=39947 GN=SODCC2 PE=1 SV=2       |
| 1087          | 18349 | 0.3  | 5   | 5    | 5    | 5     | 2.56  | Peptidyl-prolyl cis-trans isomerase OS= <i>Oryza sativa</i> subsp. indica OX=39946 GN=OsI_05635 PE=2 SV=1 |
| 645           | 18440 | 0.44 | 5   | 5    | 3    | 3     | 2.53  | Uncharacterized protein OS= <i>Oryza sativa</i> subsp. indica OX=39946 GN=OsI_27689 PE=4 SV=1             |

|     |       |      |   |   |   |   |      |                                                                                                               |
|-----|-------|------|---|---|---|---|------|---------------------------------------------------------------------------------------------------------------|
| 522 | 19300 | 0.22 | 4 | 4 | 4 | 4 | 1.62 | Uncharacterized protein OS= <i>Oryza sativa</i> subsp. indica OX=39946<br>GN=OsI_28556 PE=4 SV=1              |
| 469 | 16929 | 0.55 | 6 | 6 | 6 | 6 | 4.16 | Uncharacterized protein OS= <i>Oryza sativa</i> subsp. indica OX=39946<br>GN=OsI_00285 PE=3 SV=1              |
| 343 | 17899 | 0.32 | 4 | 4 | 1 | 1 | 1.83 | 17.9 kDa class I heat shock protein OS= <i>Oryza sativa</i> subsp. japonica OX=39947<br>GN=HSP17.9A PE=1 SV=1 |
| 269 | 17647 | 0.31 | 4 | 4 | 2 | 2 | 1.87 | 17.7 kDa class I heat shock protein OS= <i>Oryza sativa</i> subsp. japonica OX=39947<br>GN=HSP17.7 PE=2 SV=1  |
| 118 | 18071 | 0.3  | 4 | 4 | 2 | 2 | 1.8  | 18.1 kDa class I heat shock protein OS= <i>Oryza sativa</i> subsp. japonica OX=39947<br>GN=HSP18.1 PE=2 SV=1  |
| 116 | 17634 | 0.24 | 3 | 3 | 1 | 1 | 1.2  | Heat shock protein Hsp20 OS= <i>Oryza sativa</i> subsp. japonica OX=39947 PE=2<br>SV=1                        |
| 421 | 17737 | 0.41 | 5 | 5 | 4 | 4 | 2.7  | OSJNb0093F12.16 protein OS= <i>Oryza sativa</i> subsp. japonica OX=39947<br>GN=Os04g0598200 PE=3 SV=1         |
| 163 | 19759 | 0.13 | 2 | 2 | 1 | 1 | 0.6  | 60S ribosomal protein L12 OS= <i>Ustilaginoidea virens</i> OX=1159556<br>GN=UV8b_7599 PE=3 SV=1               |
| 390 | 16229 | 0.39 | 4 | 4 | 4 | 4 | 2.15 | Os01g0225600 protein OS= <i>Oryza sativa</i> subsp. japonica OX=39947<br>GN=Os01g0225600 PE=4 SV=1            |
| 339 | 15273 | 0.45 | 4 | 4 | 3 | 3 | 2.36 | Uncharacterized protein OS= <i>Oryza sativa</i> subsp. indica OX=39946<br>GN=OsI_18149 PE=3 SV=1              |

|     |       |      |   |   |   |   |      |                                                                                                            |
|-----|-------|------|---|---|---|---|------|------------------------------------------------------------------------------------------------------------|
| 161 | 15010 | 0.32 | 3 | 3 | 2 | 2 | 1.53 | Cytochrome b5 OS= <i>Oryza sativa</i> subsp. indica OX=39946 GN=OsI_05385 PE=2 SV=1                        |
| 333 | 23449 | 0.34 | 7 | 7 | 6 | 6 | 3.04 | Peptidyl-prolyl cis-trans isomerase OS= <i>Oryza sativa</i> subsp. indica OX=39946 GN=OsI_24414 PE=3 SV=1  |
| 720 | 20519 | 0.43 | 5 | 5 | 5 | 5 | 2.11 | Superoxide dismutase [Cu-Zn] OS= <i>Oryza sativa</i> subsp. indica OX=39946 GN=OsI_30285 PE=3 SV=1         |
| 276 | 16250 | 0.47 | 6 | 6 | 6 | 6 | 4.58 | Alba1 OS= <i>Oryza sativa</i> subsp. indica OX=39946 GN=Alba1 PE=2 SV=1                                    |
| 204 | 20502 | 0.23 | 4 | 4 | 4 | 4 | 1.48 | Late embryogenesis abundant protein 19 OS= <i>Oryza sativa</i> subsp. japonica OX=39947 GN=LEA19 PE=2 SV=1 |
| 183 | 18826 | 0.28 | 4 | 4 | 4 | 4 | 1.68 | Uncharacterized protein OS= <i>Oryza sativa</i> subsp. indica OX=39946 GN=OsI_33745 PE=4 SV=1              |
| 182 | 15154 | 0.48 | 4 | 4 | 4 | 4 | 2.39 | Os08g0327700 protein OS= <i>Oryza sativa</i> subsp. japonica OX=39947 GN=Os08g0327700 PE=2 SV=1            |
| 179 | 17760 | 0.35 | 5 | 5 | 2 | 2 | 2.7  | Os08g0117200 protein (Fragment) OS= <i>Oryza sativa</i> subsp. japonica OX=39947 GN=Os08g0117200 PE=3 SV=1 |
| 124 | 17135 | 0.41 | 6 | 6 | 3 | 3 | 4.11 | 40S ribosomal protein S13-2 OS= <i>Oryza sativa</i> subsp. japonica OX=39947 GN=Os08g0117300 PE=1 SV=1     |
| 177 | 19645 | 0.13 | 1 | 1 | 1 | 1 | 0.27 | Uncharacterized protein OS= <i>Oryza sativa</i> subsp. indica OX=39946 GN=OsI_13912 PE=3 SV=1              |
| 176 | 21879 | 0.3  | 5 | 5 | 5 | 5 | 1.91 | Os12g0626500 protein OS= <i>Oryza sativa</i> subsp. japonica OX=39947 GN=Os12g0626500 PE=4 SV=1            |



|               |             |           |            |             |             |              |              |                                                                                                                                                                                          |
|---------------|-------------|-----------|------------|-------------|-------------|--------------|--------------|------------------------------------------------------------------------------------------------------------------------------------------------------------------------------------------|
| 176           | 18596       | 0.42      | 5          | 5           | 5           | 5            | 2.48         | Cyanate hydratase OS= <i>Oryza sativa</i> subsp. indica OX=39946 GN=CYN PE=3 SV=1                                                                                                        |
| <b>BAND 5</b> |             |           |            |             |             |              |              |                                                                                                                                                                                          |
| <b>Score</b>  | <b>Mass</b> | <b>SC</b> | <b>NOS</b> | <b>NOSS</b> | <b>NOUS</b> | <b>NOSUS</b> | <b>emPAI</b> | <b>Description</b>                                                                                                                                                                       |
| 893           | 18234       | 0.59      | 6          | 6           | 6           | 6            | 3.63         | Os05g0468800 protein OS= <i>Oryza sativa</i> subsp. japonica OX=39947 GN=Os05g0468800 PE=4 SV=1                                                                                          |
| 595           | 18359       | 0.61      | 7          | 7           | 7           | 7            | 4.92         | Mitochondrial import inner membrane translocase subunit Tim17/Tim22/Tim23 family protein, putative, expressed OS= <i>Oryza sativa</i> subsp. japonica OX=39947 GN=Os03g0305600 PE=2 SV=1 |
| 591           | 21404       | 0.34      | 5          | 5           | 5           | 5            | 1.97         | OSIGBa0115K01-H0319F09.5 protein OS= <i>Oryza sativa</i> OX=4530 GN=OSIGBa0115K01-H0319F09.5 PE=4 SV=1                                                                                   |
| 338           | 27144       | 0.56      | 8          | 8           | 8           | 8            | 2.96         | Uncharacterized protein OS= <i>Oryza sativa</i> subsp. indica OX=39946 GN=OsI_10103 PE=4 SV=1                                                                                            |
| 334           | 18906       | 0.34      | 3          | 3           | 3           | 3            | 1.1          | Putative stress-related protein OS= <i>Oryza sativa</i> subsp. japonica OX=39947 GN=OSJNBa0047E24.27 PE=4 SV=1                                                                           |
| 315           | 21849       | 0.42      | 6          | 6           | 6           | 6            | 2.6          | Uncharacterized protein OS= <i>Oryza sativa</i> subsp. indica OX=39946 GN=OsI_39200 PE=4 SV=1                                                                                            |
| 267           | 24470       | 0.42      | 6          | 6           | 6           | 6            | 2.15         | Uncharacterized protein OS= <i>Oryza sativa</i> subsp. indica OX=39946 GN=OsI_01378 PE=4 SV=1                                                                                            |
| 262           | 22119       | 0.14      | 2          | 2           | 2           | 2            | 0.53         | Group 3 late embryogenesis abundant protein OS= <i>Oryza sativa</i> subsp. indica OX=39946 GN=Wsi18 PE=2 SV=1                                                                            |

[illegible]

| Score | Mass  | SC   | NOS | NOSS | NOUS | NOSUS | emPAI | Description                                                                                                                    |
|-------|-------|------|-----|------|------|-------|-------|--------------------------------------------------------------------------------------------------------------------------------|
| 2417  | 40127 | 0.45 | 14  | 14   | 14   | 14    | 4.76  | Subtilisin-like protease pr1a OS= <i>Ustilaginoidea virens</i> OX=1159556 GN=UV8b_1567 PE=3 SV=1                               |
| 859   | 41218 | 0.35 | 9   | 9    | 9    | 9     | 2.12  | GPI-anchored cell wall beta-1,3-endoglucanase EglC OS= <i>Ustilaginoidea virens</i> OX=1159556 GN=UV8b_6459 PE=4 SV=1          |
| 411   | 39645 | 0.23 | 5   | 5    | 5    | 5     | 1.29  | Subtilisin-like protease pr1a OS= <i>Ustilaginoidea virens</i> OX=1159556 GN=UV8b_44 PE=3 SV=1                                 |
| 268   | 32258 | 0.33 | 7   | 7    | 7    | 7     | 1.76  | Os04g0404400 protein (Fragment) OS= <i>Oryza sativa</i> subsp. japonica OX=39947 GN=Os04g0404400 PE=4 SV=1                     |
| 208   | 33781 | 0.29 | 9   | 9    | 9    | 9     | 2.49  | Putative nuclease S1 OS= <i>Ustilaginoidea virens</i> OX=1159556 GN=UV8b_1810 PE=4 SV=1                                        |
| 176   | 37021 | 0.18 | 5   | 5    | 5    | 5     | 1.14  | Transaldolase OS= <i>Ustilaginoidea virens</i> OX=1159556 GN=UVI_02016190 PE=4 SV=1                                            |
| 148   | 29978 | 0.25 | 5   | 5    | 5    | 5     | 1.55  | TH14-3-3 like protein OS= <i>Ustilaginoidea virens</i> OX=1159556 GN=UV8b_5776 PE=3 SV=1                                       |
| 145   | 64232 | 0.11 | 5   | 5    | 5    | 5     | 0.44  | 2-isopropylmalate synthase B, putative, expressed OS= <i>Oryza sativa</i> subsp. japonica OX=39947 GN=LOC_Os12g04440 PE=3 SV=1 |
| 143   | 34727 | 0.23 | 5   | 5    | 5    | 5     | 1.25  | Putative palmitoyl-protein thioesterase OS= <i>Ustilaginoidea virens</i> OX=1159556 GN=UV8b_2012 PE=4 SV=1                     |
| 132   | 40946 | 0.09 | 2   | 2    | 2    | 2     | 0.41  | ECM33-like protein OS= <i>Ustilaginoidea virens</i> OX=1159556 GN=UV8b_3724 PE=4 SV=1                                          |

| 116           | 36714 | 0.16 | 3   | 3    | 3    | 3     | 0.47  | Adenosine kinase OS= <i>Ustilaginoidea virens</i> OX=1159556 GN=UV8b_1703 PE=4 SV=1                 |
|---------------|-------|------|-----|------|------|-------|-------|-----------------------------------------------------------------------------------------------------|
| <b>BAND 8</b> |       |      |     |      |      |       |       |                                                                                                     |
| Score         | Mass  | SC   | NOS | NOSS | NOUS | NOSUS | emPAI | Description                                                                                         |
| 427           | 16654 | 0.4  | 5   | 5    | 5    | 5     | 3.04  | Cnd01770-like protein OS= <i>Ustilaginoidea virens</i> OX=1159556 GN=UV8b_1318 PE=4 SV=1            |
| 196           | 15026 | 0.24 | 2   | 2    | 2    | 2     | 0.86  | Ester cyclase OS= <i>Ustilaginoidea virens</i> OX=1159556 GN=UV8b_4649 PE=4 SV=1                    |
| 158           | 16094 | 0.19 | 2   | 2    | 2    | 2     | 0.78  | Superoxide dismutase [Cu-Zn] OS= <i>Ustilaginoidea virens</i> OX=1159556 GN=UV8b_988 PE=3 SV=1      |
| 157           | 19494 | 0.3  | 4   | 4    | 4    | 4     | 1.59  | Uncharacterized protein OS= <i>Ustilaginoidea virens</i> non segmented virus 1 OX=1520125 PE=4 SV=1 |
| 156           | 17153 | 0.22 | 3   | 3    | 3    | 3     | 1.25  | Small secreted protein OS= <i>Ustilaginoidea virens</i> OX=1159556 GN=UV8b_1554 PE=4 SV=1           |
| 132           | 17877 | 0.22 | 2   | 2    | 2    | 2     | 0.68  | Bys1 family protein OS= <i>Ustilaginoidea virens</i> OX=1159556 GN=UV8b_2621 PE=4 SV=1              |
| 117           | 15242 | 0.32 | 2   | 2    | 1    | 1     | 0.84  | Superoxide dismutase [Cu-Zn] 1 OS= <i>Oryza sativa</i> subsp. indica OX=39946 GN=SODCC1 PE=2 SV=2   |
| 128           | 16769 | 0.35 | 4   | 4    | 4    | 4     | 2.03  | Nucleoside diphosphate kinase OS= <i>Oryza sativa</i> subsp. indica OX=39946 GN=OsI_34670 PE=2 SV=1 |



|     |       |      |   |   |   |   |      |                                                                                                     |
|-----|-------|------|---|---|---|---|------|-----------------------------------------------------------------------------------------------------|
| 83  | 16835 | 0.22 | 3 | 3 | 3 | 3 | 1.28 | Nucleoside diphosphate kinase 1 OS= <i>Oryza sativa</i> subsp. indica OX=39946<br>GN=NDKR PE=1 SV=1 |
| 125 | 21916 | 0.25 | 4 | 4 | 4 | 4 | 1.35 | Uncharacterized protein OS= <i>Oryza sativa</i> subsp. indica OX=39946<br>GN=OsI_12872 PE=4 SV=1    |
| 119 | 39360 | 0.18 | 3 | 3 | 3 | 3 | 0.43 | Subtilisin-like protease pr1a OS= <i>Ustilagoidea virens</i> OX=1159556<br>GN=UV8b_44 PE=3 SV=1     |
| 118 | 61659 | 0.11 | 5 | 5 | 5 | 5 | 0.46 | Peroxidase OS= <i>Ustilagoidea virens</i> OX=1159556 GN=UV8b_5622 PE=3 SV=1                         |
| 111 | 16035 | 0.31 | 4 | 4 | 4 | 4 | 2.2  | Small secreted protein OS= <i>Ustilagoidea virens</i> OX=1159556 GN=UV8b_6932<br>PE=4 SV=1          |
| 105 | 17946 | 0.19 | 2 | 2 | 2 | 2 | 0.68 | DNase1 protein OS= <i>Ustilagoidea virens</i> OX=1159556 GN=UV8b_187 PE=4<br>SV=1                   |

134 Note: SC = Sequence coverage, NOS = Number of sequences, NOSS = Number of significant sequences, NOUS = Number of unique sequences,  
135 NOSUS = Number of significant unique sequences, emPAI = Exponentially modified protein abundance index
